# Supplementary material for: Screening for Rare Mitochondrial Genome Variants Reveals a Potentially Novel Association between MT-CO1 and MT-TL2 Genes and Diabetes Phenotype
Source: MDPI journal article supplement (doi:10.3390/ijms25042438), 2024-02-19
Supplement: s1 [file s1]

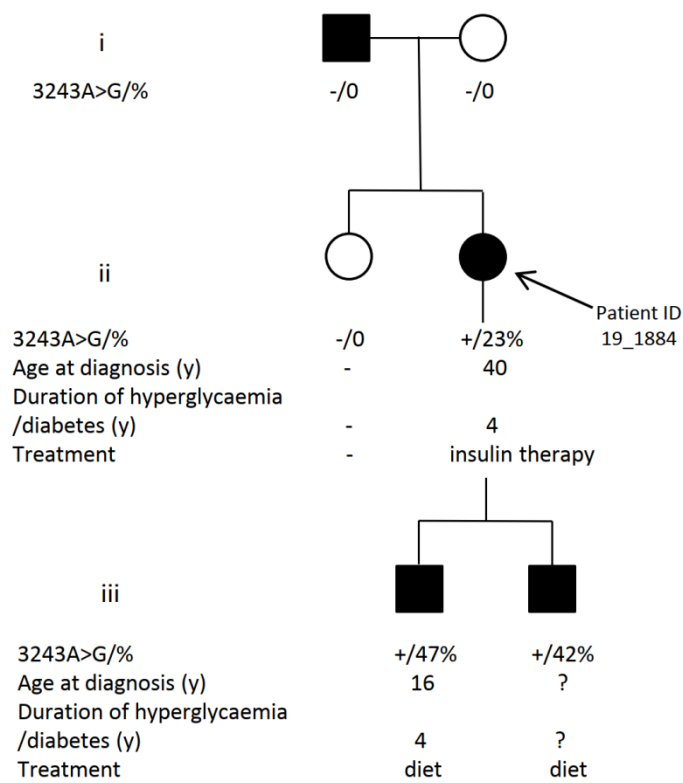

**Figure S1.** Pedigrees of family (19\_1884 patient ID) with heteroplasmic variant 3243A>G. Genotype is shown underneath each symbol; - and + indicate wild-type and mutant alleles, respectively. Below is the genotype, age of diabetes onset in years, duration in years. Squares represent male family members, and circles represent female sex. Black-filled symbols denote patients with diabetes, an arrow denotes the proband in the family.

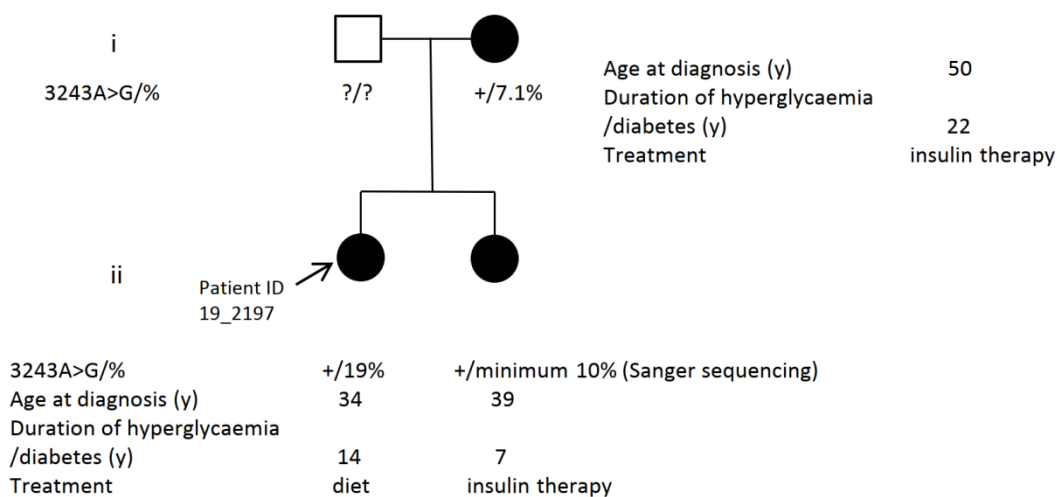

**Figure S2.** Pedigrees of family (119\_2197 patient ID) with heteroplasmic variant 3243A>G. Genotype is shown underneath each symbol; - and + indicate wild-type and mutant alleles, respectively. Below is the genotype, age of diabetes onset in years, duration in years. Squares represent male family members, and circles represent female sex. Black-filled symbols denote patients with diabetes, an arrow denotes the proband in the family.

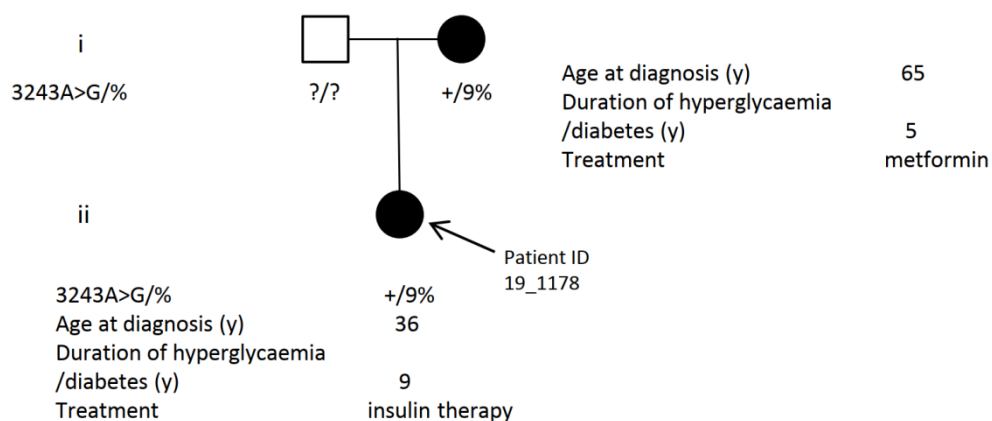

**Figure S3.** Pedigrees of family (19\_1178 patient ID) with heteroplasmic variant 3243A>G. Genotype is shown underneath each symbol; - and + indicate wild-type and mutant alleles, respectively. Below is the genotype, age of diabetes onset in years, duration in years. Squares represent male family members, and circles represent female sex. Black-filled symbols denote patients with diabetes, an arrow denotes the proband in the family.

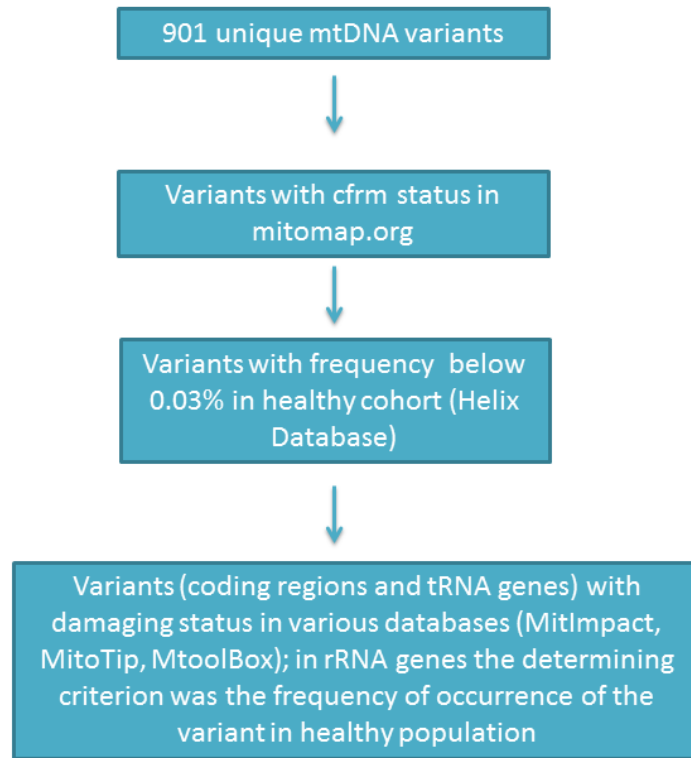

**Figure S4.** Criteria that were used when selecting variants.

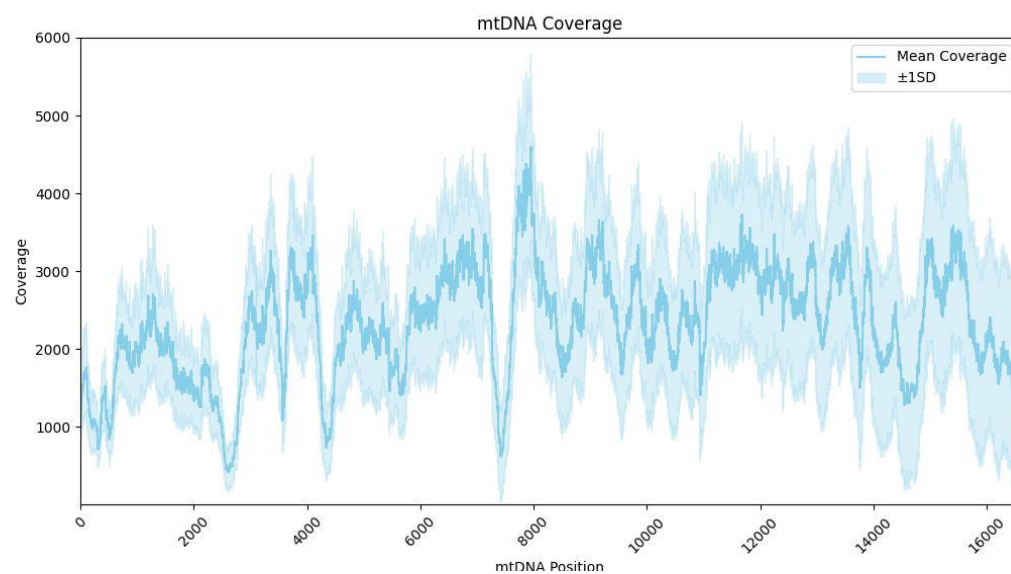

**Figure S5.** Average coverage across mtDNA genome in all samples.
